# Supplementary material for: Osteogenic and Anti-Inflammatory Behavior of Injectable Calcium Phosphate Loaded with Therapeutic Drugs
Source: PubMed Central journal article supplement (PMC7558013; doi:10.3390/nano10091743), 2020-09-03
Supplement: nanomaterials-10-01743-s001.pdf [file nanomaterials-10-01743-s001.pdf]

# Osteogenic and Anti-Inflammatory Behavior of Injectable Calcium Phosphate Loaded with Therapeutic Drugs

Ines Fasolino \*, Alessandra Soriente, Luigi Ambrosio and Maria Grazia Raucci \*

Institute of Polymers, Composites and Biomaterials—National Research Council (IPCB-CNR),  
 Mostra d’Oltremare pad.20—Viale J.F. Kennedy 54, 80125 Naples, Italy; alessandra.soriente@cnr.it (A.S.);  
 luigi.ambrosio@cnr.it (L.A.)

\* Correspondence: ines.fasolino@cnr.it (I.F.); mariagrazia.raucci@cnr.it (M.G.R.)

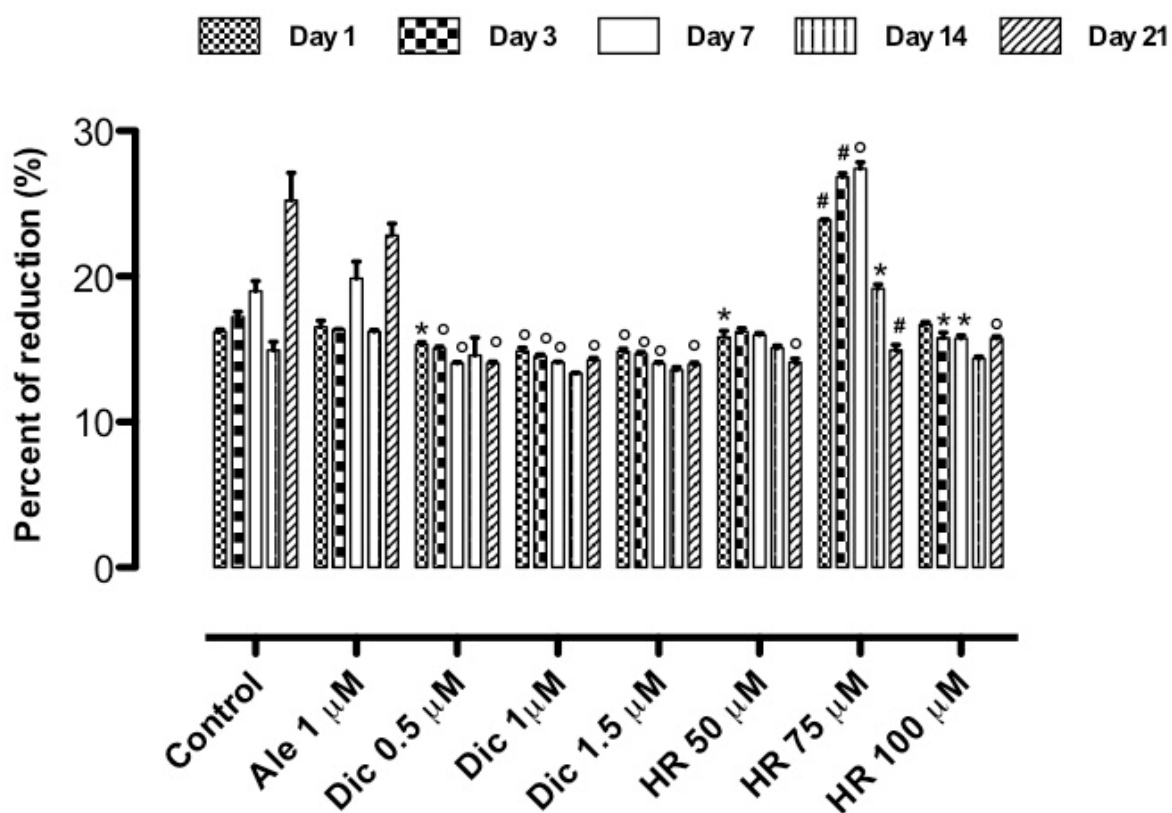

**Figure S1.** Alamar Blue percent of reduction measured at days 1, 3, 7, 14 and 21 of osteoblasts exposure to drug solutions. Data represent mean ± dev.st. of 3 independent experiments ( $n = 6$ ). \*  $p < 0.05$ ; °  $p < 0.01$ ; #  $p < 0.001$  vs. Control.

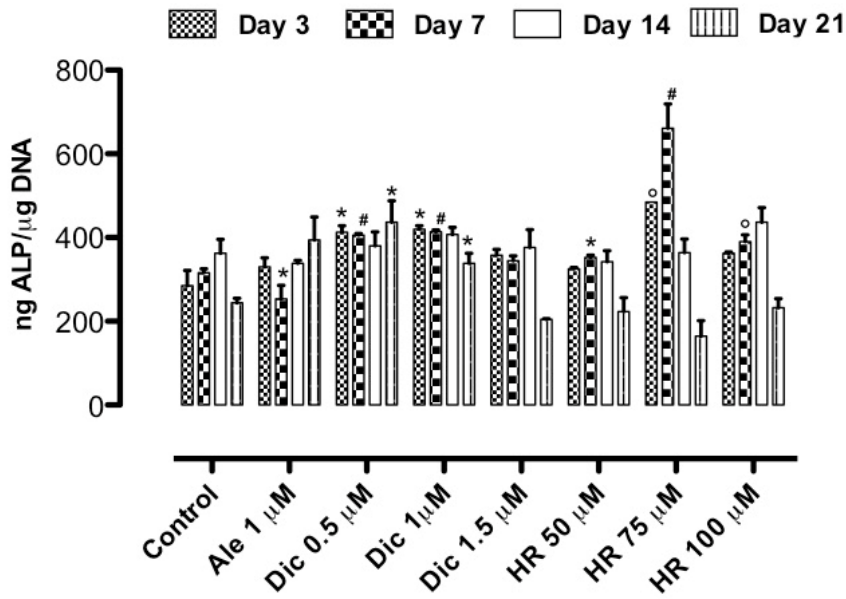

**Figure S2.** Alkaline phosphatase activity after 3, 7, 14, 21 days of exposure of osteoblast cell cultures to drug solutions. Data represent mean  $\pm$  dev.st. of 3 independent experiments ( $n = 6$ ). \*  $p < 0.05$ ; °  $p < 0.01$ ; #  $p < 0.001$  vs. Control.

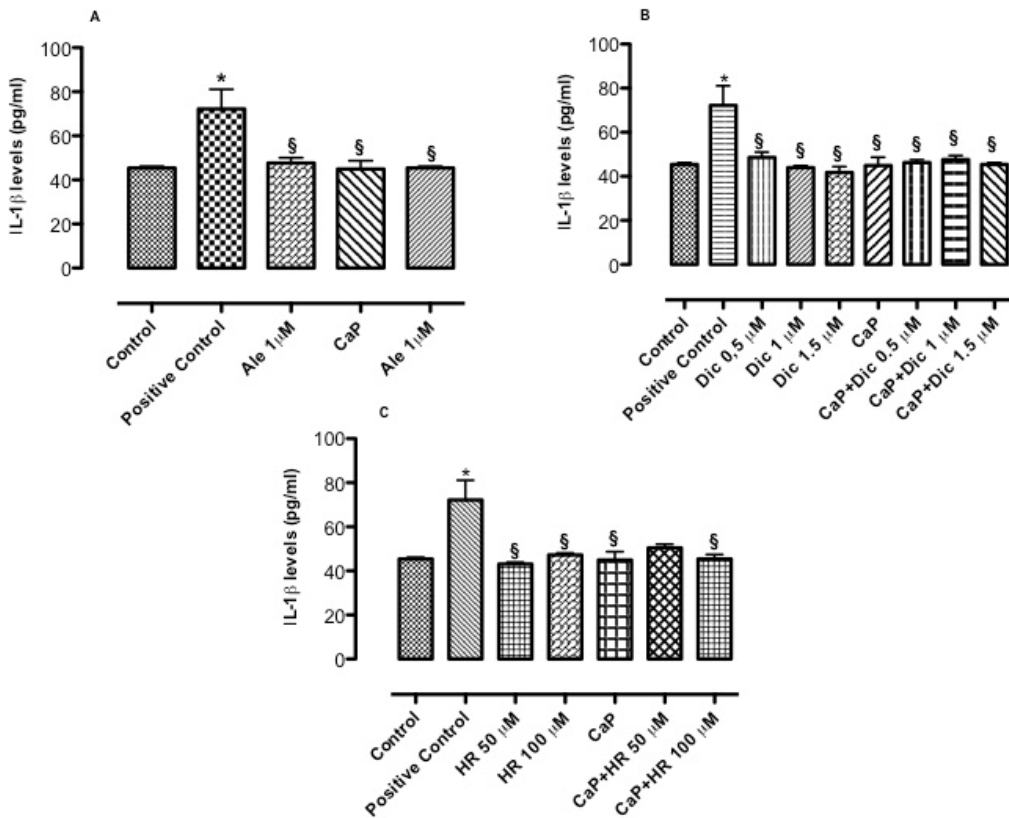

**Figure S3.** Effect of CaP with and w/o Ale (A), Dic (B), HR (C) on basal IL-1 $\beta$  on osteoblast cell cultures after 72 h. Results, expressed as interleukin levels (pg/mL), are mean  $\pm$  dev.st. of 3 independent experiments ( $n = 6$ ). (A) §  $p < 0.05$ , °  $p < 0.01$  and §  $p < 0.001$  vs. positive control. (B) \*  $p < 0.05$ , °  $p < 0.01$ , #  $p < 0.001$  vs. control; \* and §  $p < 0.05$ , °  $p < 0.01$  and §  $p < 0.001$  vs. positive control. (C) \*  $p < 0.05$ , °  $p < 0.01$ , #  $p < 0.001$  vs. control; \* and §  $p < 0.05$ , °  $p < 0.01$  and §  $p < 0.001$  vs. positive control.

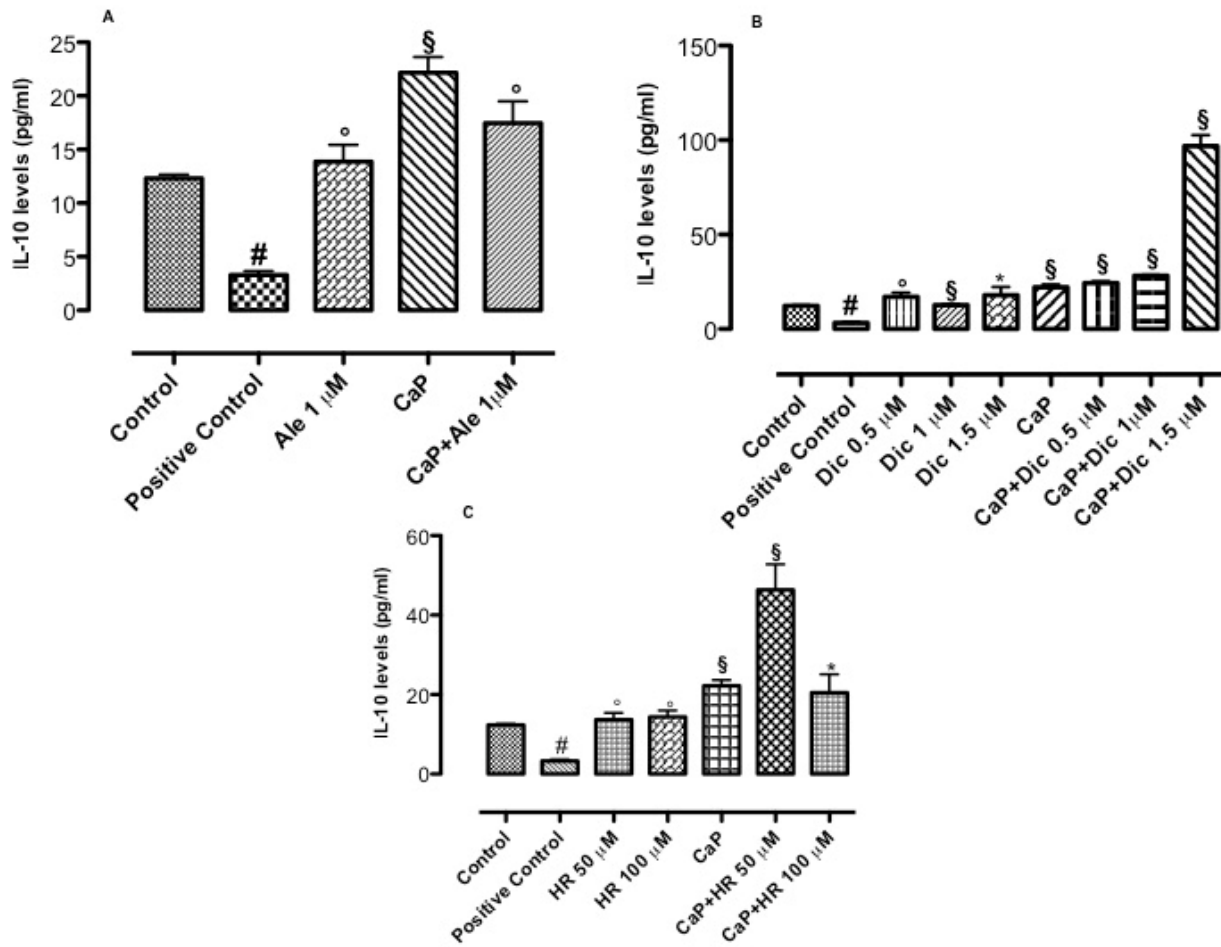

**Figure S4.** Effect of CaP with and w/o Ale (A), Dic (B), HR (C) on basal IL-10 on osteoblast cell cultures after 72 h. Results, expressed as interleukin levels (pg/mL), are mean  $\pm$  dev.st. of 3 independent experiments ( $n = 6$ ). (A) §  $p < 0.05$ , °  $p < 0.01$  and §  $p < 0.001$  vs. positive control. (B) \*  $p < 0.05$ , °  $p < 0.01$ , #  $p < 0.001$  vs. control; \* and §  $p < 0.05$ , °  $p < 0.01$  and §  $p < 0.001$  vs. positive control. (C) \*  $p < 0.05$ , °  $p < 0.01$ , #  $p < 0.001$  vs. control; \* and §  $p < 0.05$ , °  $p < 0.01$  and §  $p < 0.001$  vs. positive control.
